# Supplementary material for: KIAA1429 contributes to liver cancer progression through N6-methyladenosine-dependent post-transcriptional modification of GATA3
Source: PubMed Central journal article supplement (PMC6921542; doi:10.1186/s12943-019-1106-z), 2019-12-19

# Figure S2

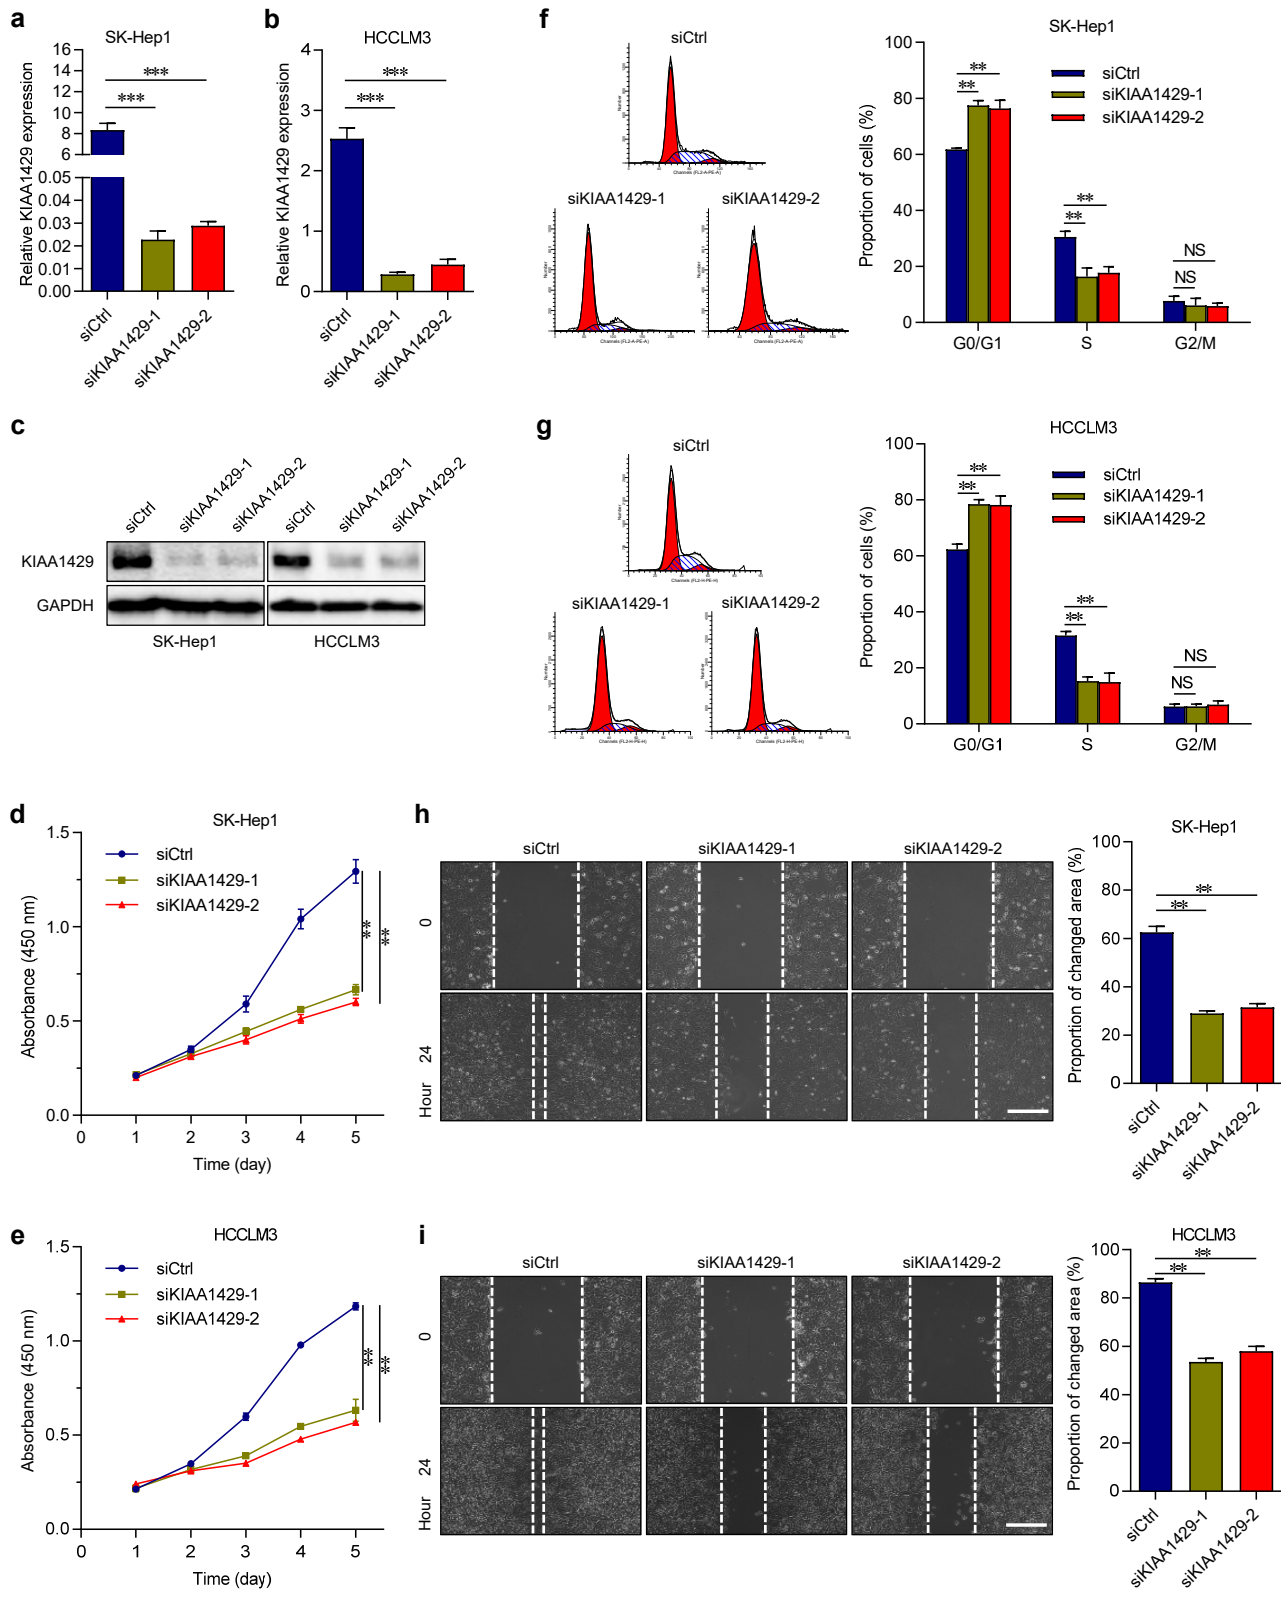

Supplement: 12943_2019_1106_MOESM4_ESM.pdf [file 12943_2019_1106_MOESM4_ESM.pdf]
