# Supplementary material for: KIAA1429 contributes to liver cancer progression through N6-methyladenosine-dependent post-transcriptional modification of GATA3
Source: Springer Nature journal article supplement (doi:10.1186/s12943-019-1106-z), 2019-12-01

**Figure S9**

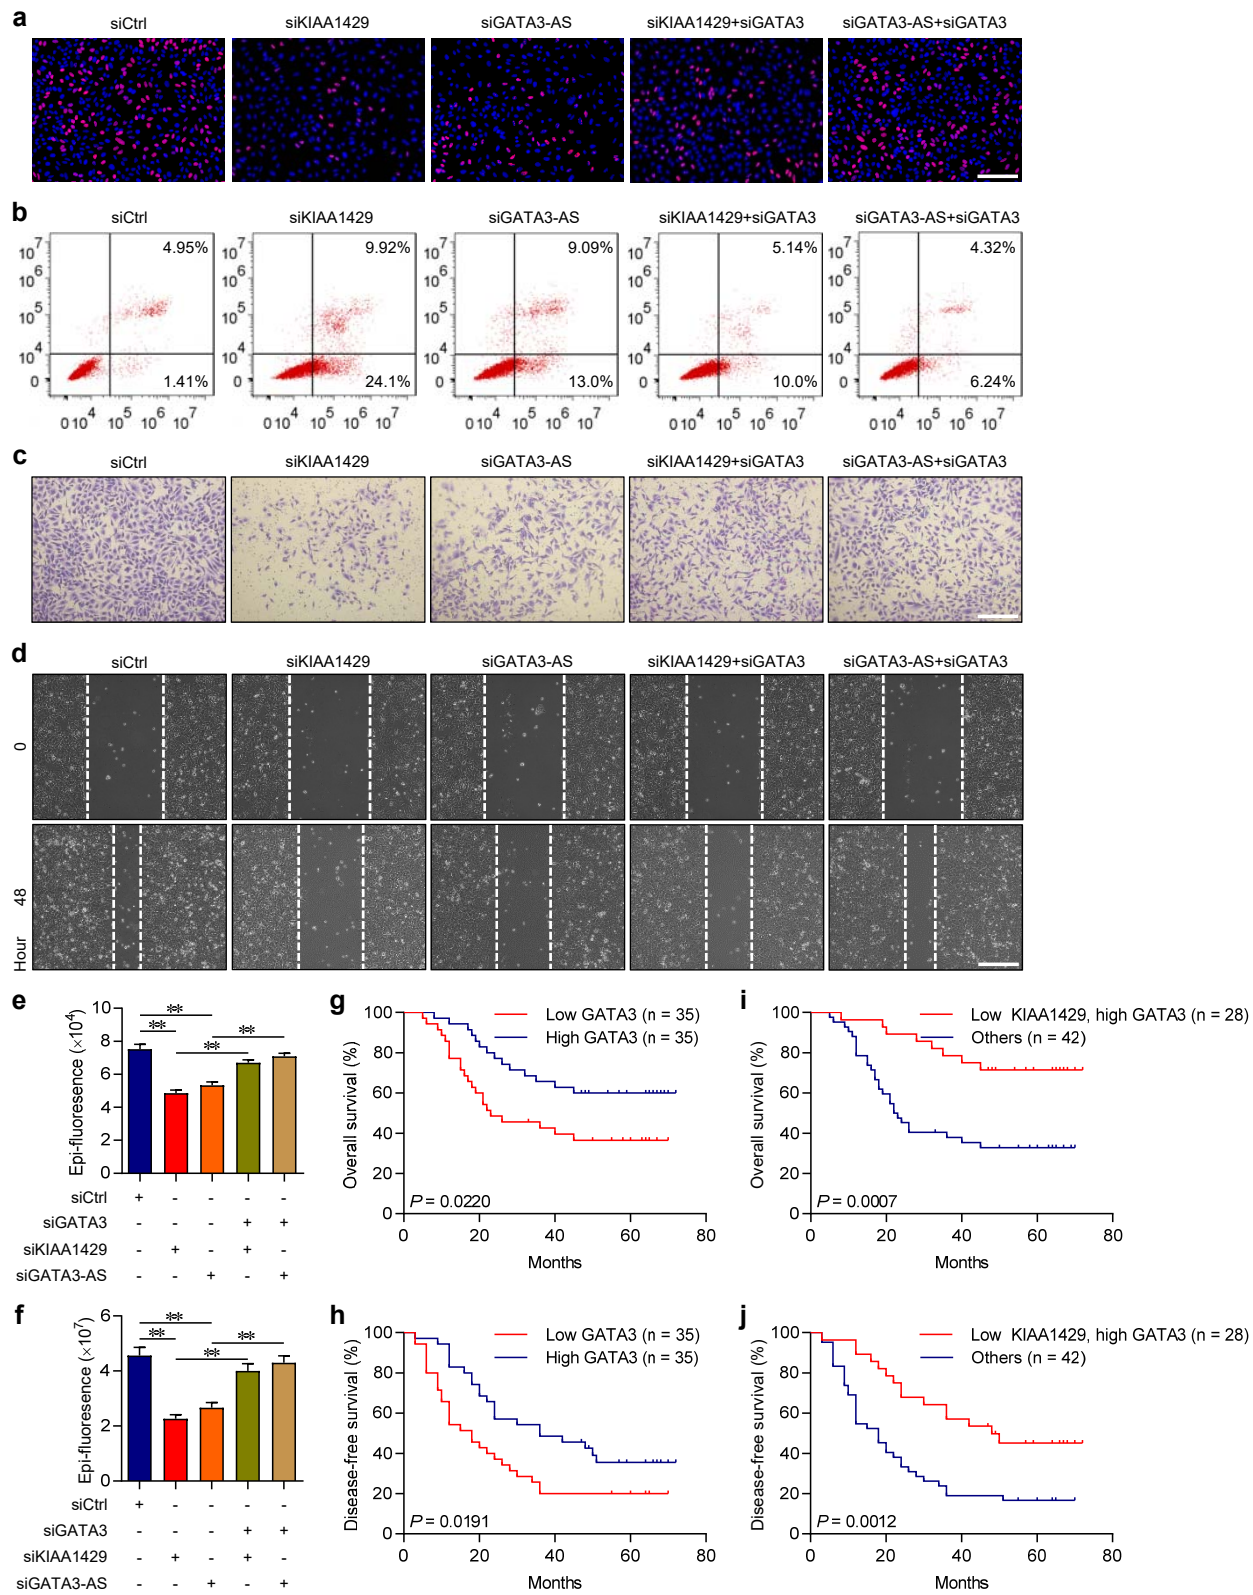

Supplement: MOESM11 [file 17679702]
